# Supplementary material
Source: PubMed Central journal article supplement (PMC3378116)
Supplement: emmm0001-0125-SD1.pdf [file emmm0001-0125-SD1.pdf]

**A**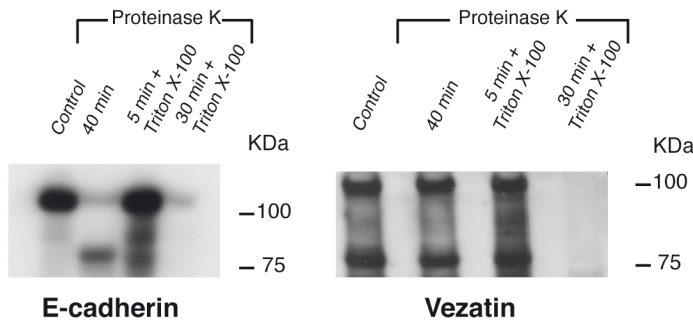**B**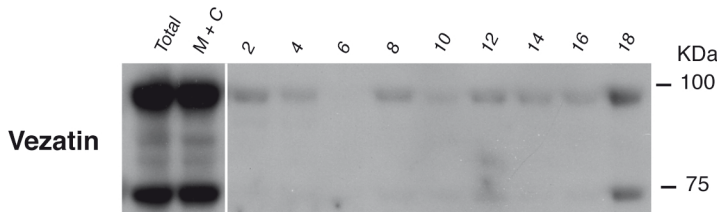**Supplementary Figure 1**

Extracellular

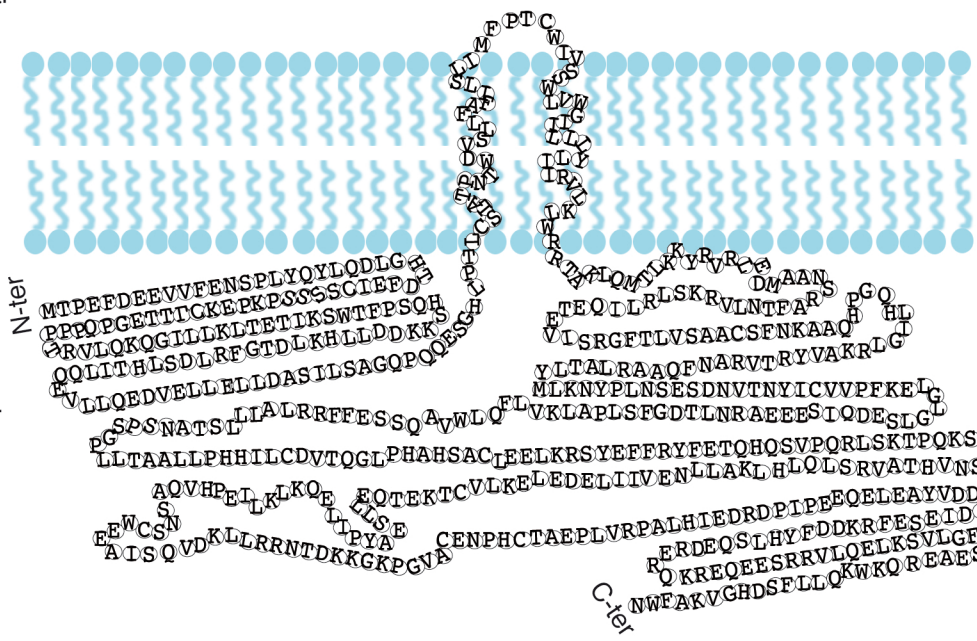

N-ter

Intracellular

C-ter

Supplementary Figure 2

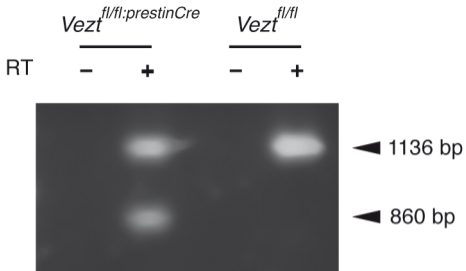

**Supplementary Figure 3**

Untreated

Latrunculin-A

E-cad/Actin

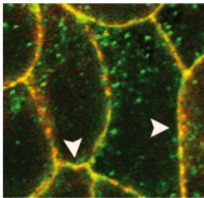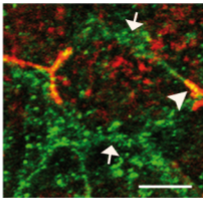

Supplementary Figure 4

## LEGENDS TO SUPPLEMENTARY FIGURES

**Figure S1: Vezatin topology. (A) Limited proteolysis experiments on confluent MDCKII cells.** Time lengths for enzyme digestion are indicated on top of each lane. E-cadherin, but not vezatin, undergoes proteolysis by proteinase K after 40 min of digestion in the absence of Triton X-100. In contrast, both proteins undergo proteolysis by proteinase K in the presence of Triton X-100. **(B) OptiPrep™ density gradient ultracentrifugation.** Confluent MDCKII cells were lysed in a iodixanol solution and subjected to ultracentrifugation. “Total” refers to MDCKII homogenate. Lanes: M + C, membrane and cytosol fraction; Equal volumes from each gradient fraction (2, 4, 6, 8, 10, 12, 14, 16, 18) were loaded onto the gel. The two vezatin isoforms detected on western blot using the antibody directed against the C-terminal region of the protein (see Materials and methods) have apparent molecular weights of approximately 90 kDa and 70 kDa. They are more abundant in the gradient top fraction (fraction 18). Dividing line has been used to separate lanes that were not contiguous in the original gel.

**Figure S2: Topological model of vezatin.** Vezatin is an integral membrane protein with two transmembrane domains, a short extracellular interdomain (7 aa), and cytoplasmic N- and C-terminal ends. Only the short isoform (617 aa) is represented here.

**Figure S3: RT-PCR detection of vezatin transcripts in the cochlear sensory epithelium of *Vezt<sup>fl/fl</sup>* and *Vezt<sup>fl/fl:PrestinCre</sup>* mice.** Only one 1136 bp PCR product is detected in *Vezt<sup>fl/fl</sup>* mice. In *Vezt<sup>fl/fl:PrestinCre</sup>* mice, both 1136 bp and 860 bp PCR products (see Materials and methods) are detected, as expected from a conditional knockout that is restricted to the sensory cells of the inner ear.

**Figure S4: Effects of F-actin disrupting drugs on E-cadherin distribution in MDCKII cells.**

In untreated MDCKII cells (left panel), E-cadherin (E-cad) and actin are colocalised at cell-cell contacts (arrowheads). Treatment of the cells by latrunculin-A (right panel) causes disruption of F-actin bundles at AJs. The E-cadherin junctional labelling becomes diffuse (arrows). The residual F-actin and E-cadherin junctional labellings at the plasma membrane, however, still colocalise (arrowhead). Scale bar = 5  $\mu\text{m}$ .
